# Supplementary material for: Guanidine-rich helical polypeptides bearing hydrophobic amino acid pendants for efficient gene delivery
Source: Royal Society of Chemistry journal article supplement (doi:10.1039/d0bm02188a), 2021-01-01
Supplement: d0bm02188a1.pdf [file d0bm02188a1.pdf]

Supporting Information

**Guanidine-Rich Helical Polypeptides Bearing Hydrophobic Amino Acid**

**Pendants for Efficient Gene Delivery**

Zikun Yu,<sup>†</sup> Zhimin Zhang,<sup>†</sup> Jing Yan, Ziyin Zhao, Chenglong Ge, Ziyuan Song,  
Lichen Yin,\* and Haoyu Tang\*

*Institute of Functional Nano & Soft Materials (FUNSOM), Collaborative Innovation  
Center of Suzhou Nano Science and Technology, Soochow University, Suzhou 215123,  
China*

<sup>†</sup> These authors contributed equally (Z.Y. and Z.Z.).

Correspondence to: Haoyu Tang (Email: [hytang@suda.edu.cn](mailto:hytang@suda.edu.cn)) or Lichen Yin (Email: [lcyin@suda.edu.cn](mailto:lcyin@suda.edu.cn))

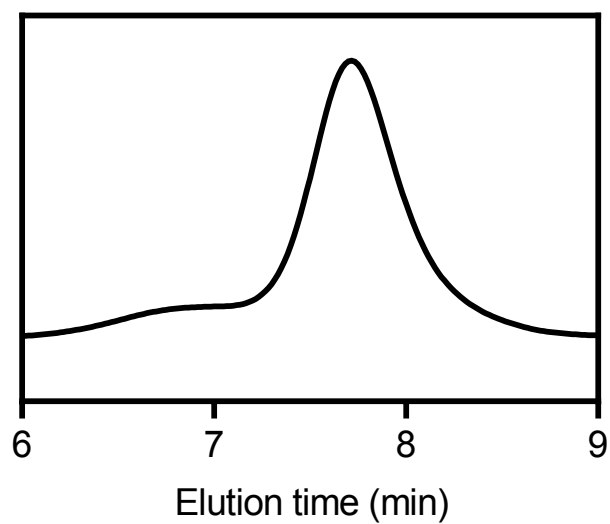

**Figure S1.** GPC curve of PAPLG ( $M_n = 26500$ ,  $DP = 125$ ,  $M_w/M_n = 1.09$ ).

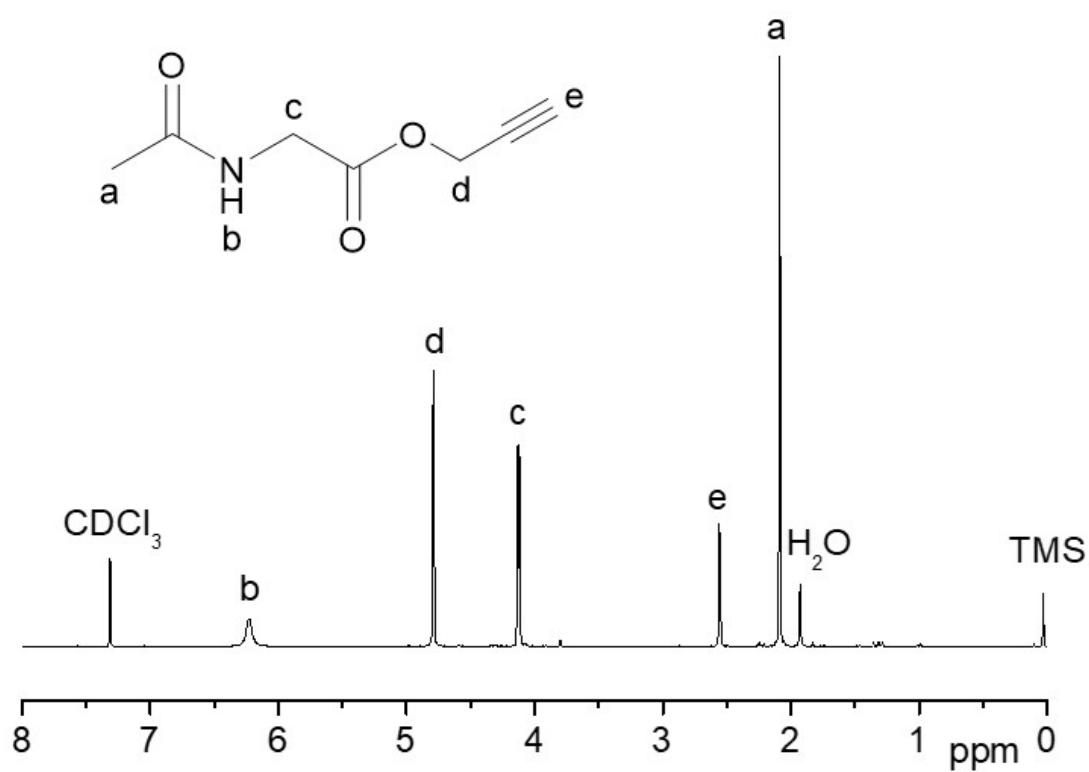

**Figure S2.**  $^1\text{H}$  NMR spectrum of PAG in  $\text{CDCl}_3$ .

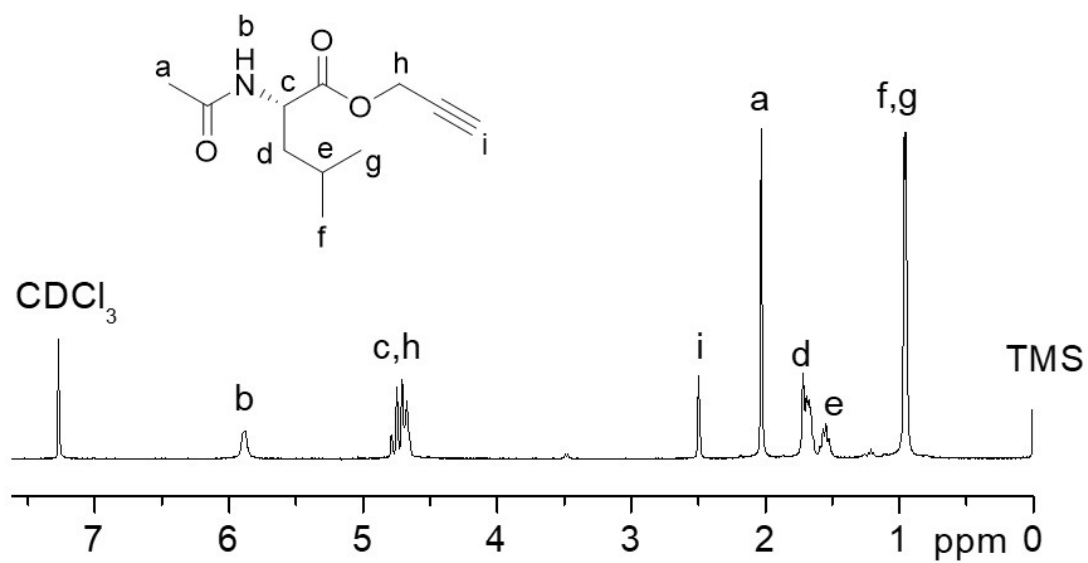

Figure S3. <sup>1</sup>H NMR spectrum of PAL in CDCl<sub>3</sub>.

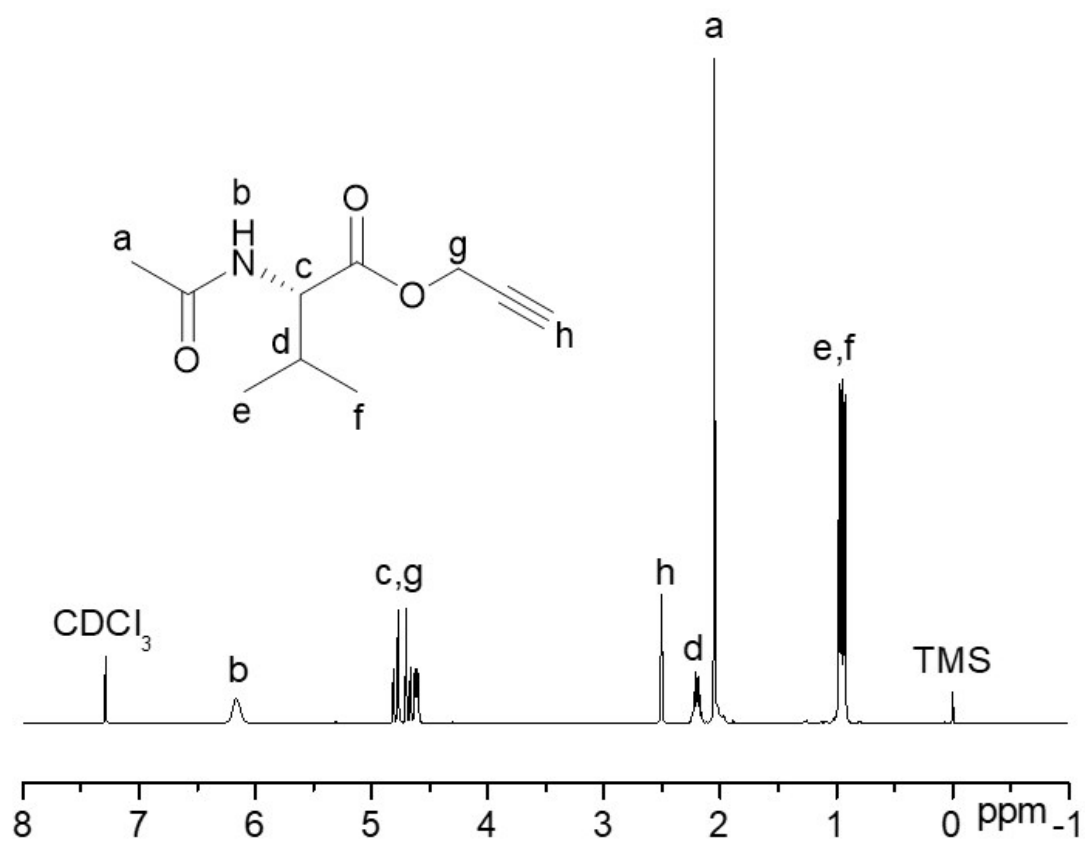

Figure S4. <sup>1</sup>H NMR spectrum of PAV in CDCl<sub>3</sub>.

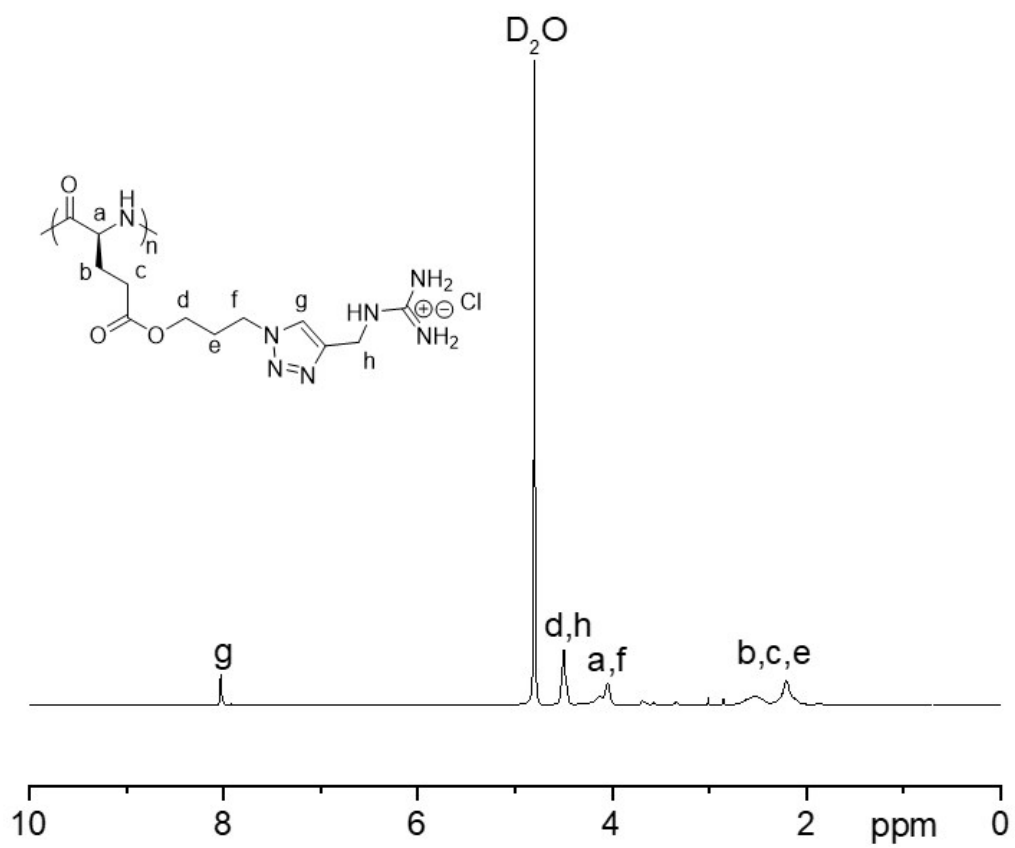

**Figure S5.**  $^1\text{H}$  NMR spectrum of P1 in  $\text{D}_2\text{O}$ .

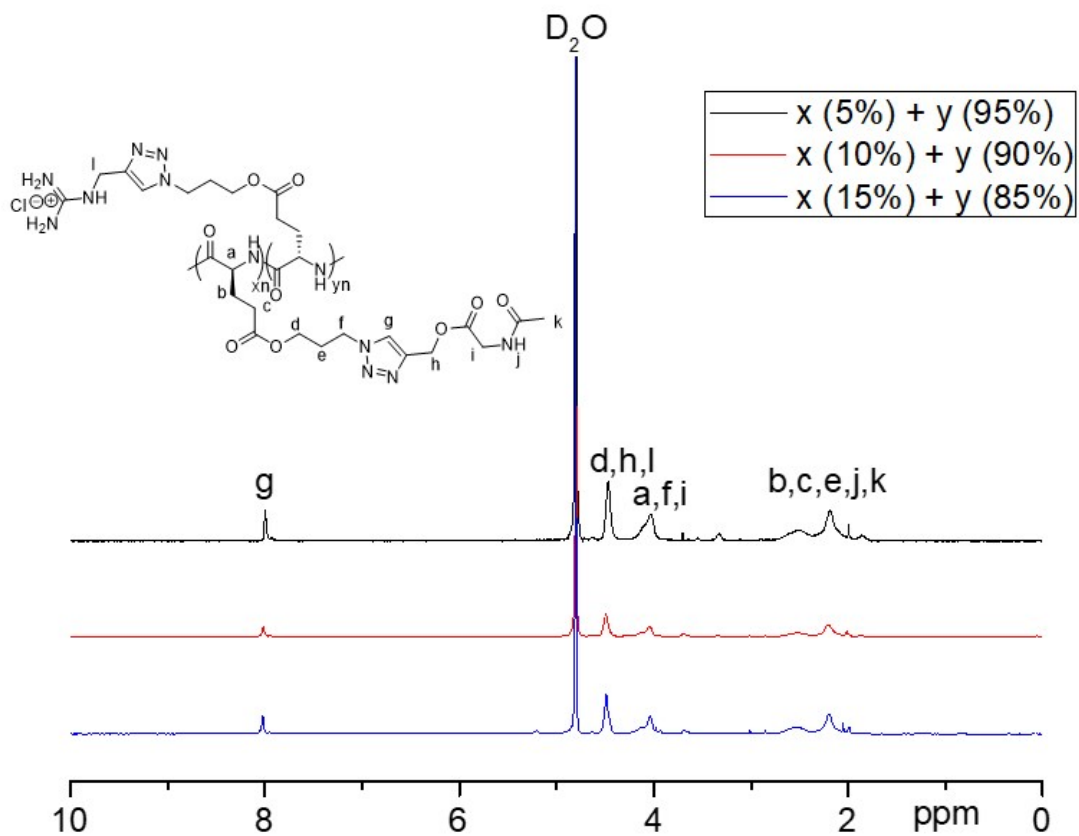

Figure S6.  $^1\text{H}$  NMR spectra of P2-P4 in  $\text{D}_2\text{O}$ .

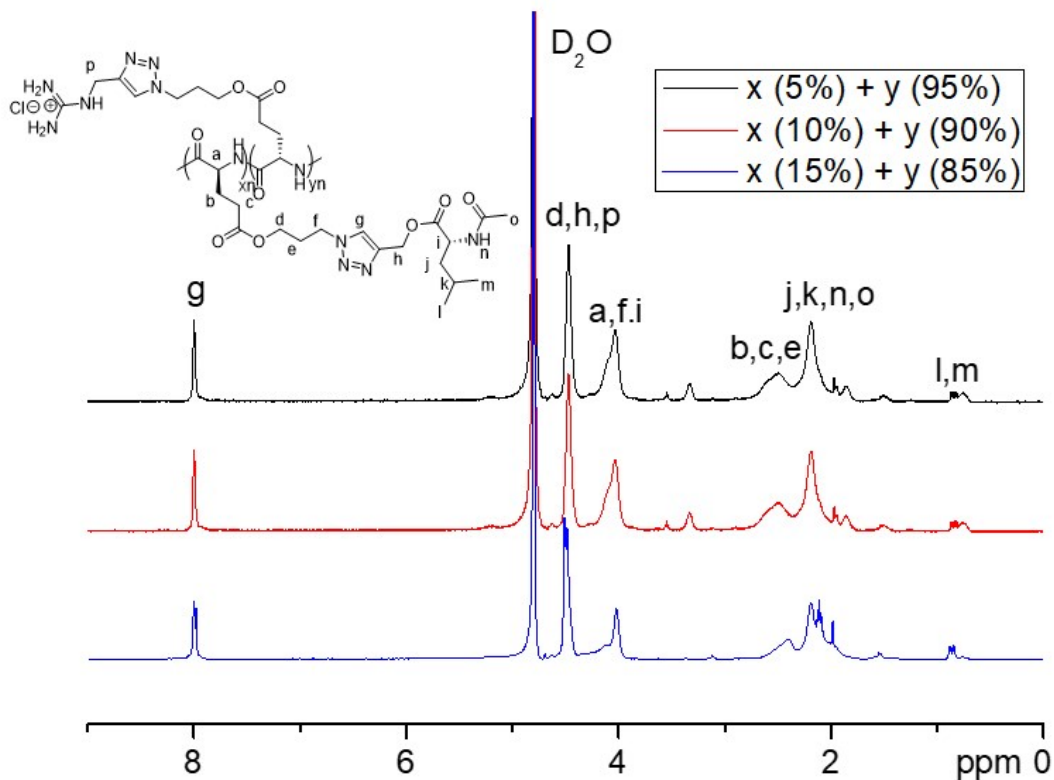

Figure S7.  $^1\text{H}$  NMR spectra of P5-P7 in  $\text{D}_2\text{O}$ .

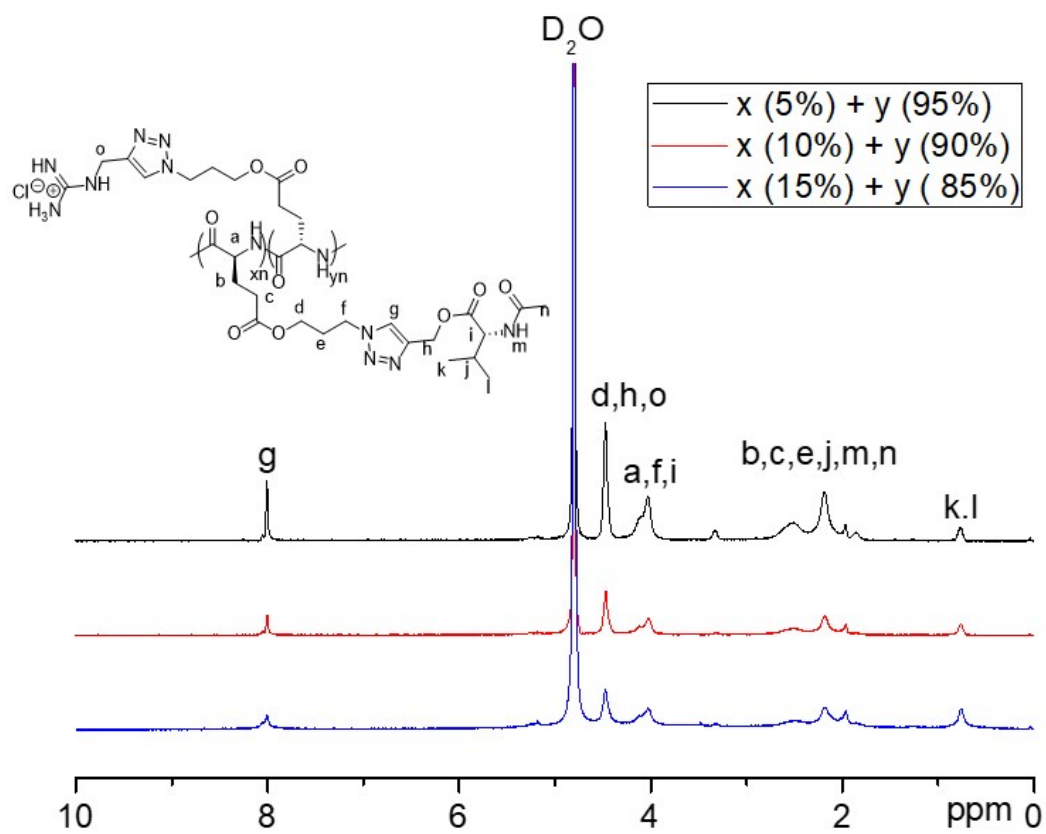

**Figure S8.** <sup>1</sup>H NMR spectra of P8-P10 in D<sub>2</sub>O.

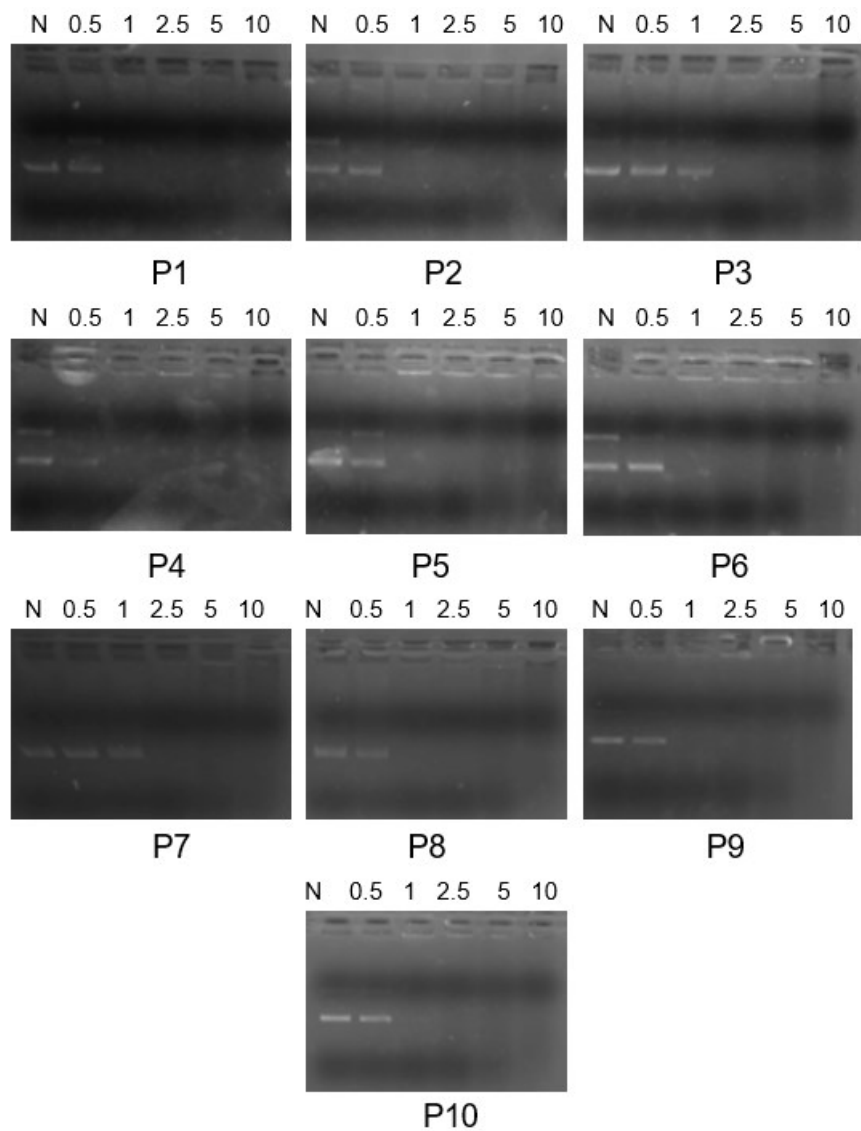

**Figure S9.** DNA condensation by P1-P10 at various polymer/DNA weight ratios as evaluated by the gel retardation assay (N represents naked DNA).

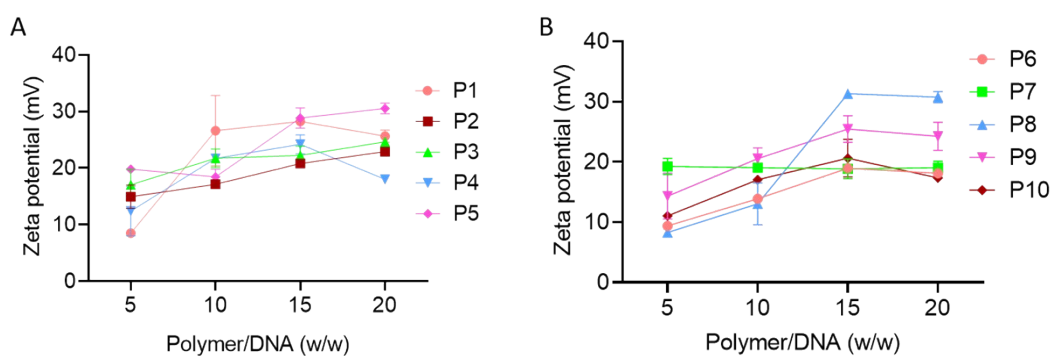

**Figure S10.** Zeta potential of polypeptide/DNA complexes ((A) P1-P5 (B) P6-P10) in DI water at various polymer/DNA weight ratios, as determined by the DLS measurement ( $n = 3$ ).

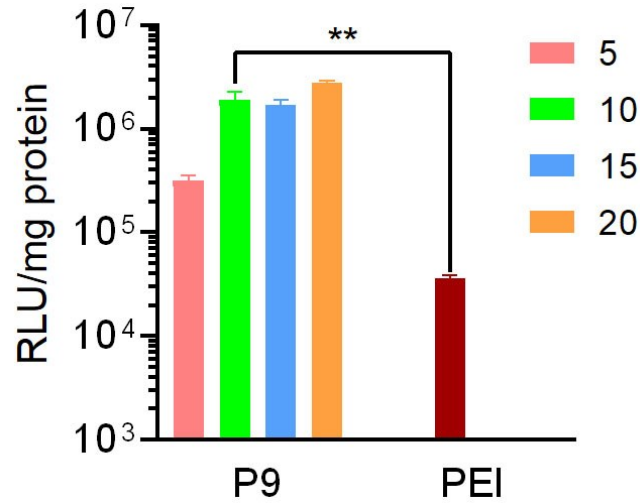

**Figure S11.** Transfection efficiency of P9 at various P9/DNA weight ratios or PEI in RAW 264.7 cells ( $n = 3$ ).

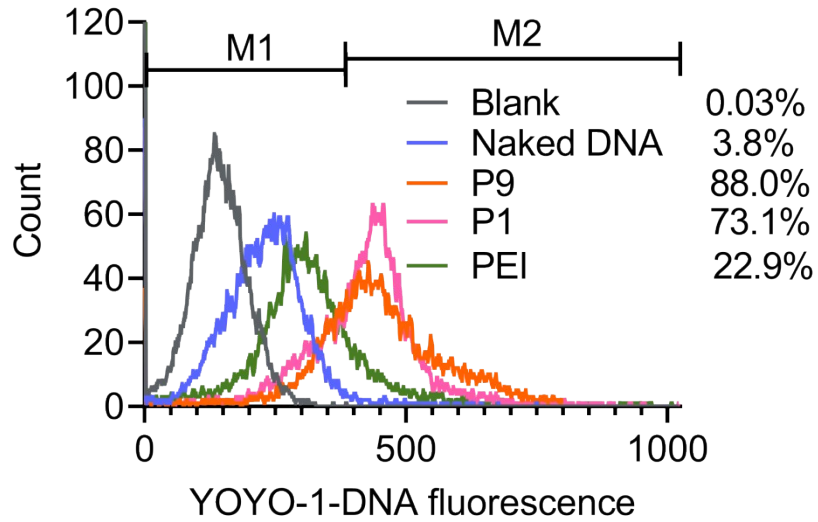

**Figure S12.** Cell uptake level of polypeptide/DNA complexes ( $w/w = 10$ ) in HeLa cells as determined by flow cytometry. PEI/DNA complexes ( $w/w = 1$ ) and naked YOYO-1-DNA were used as controls. M1 and M2 phases represent YOYO-1-DNA negative and positive cells, respectively. The percentages of M2 cells were listed.



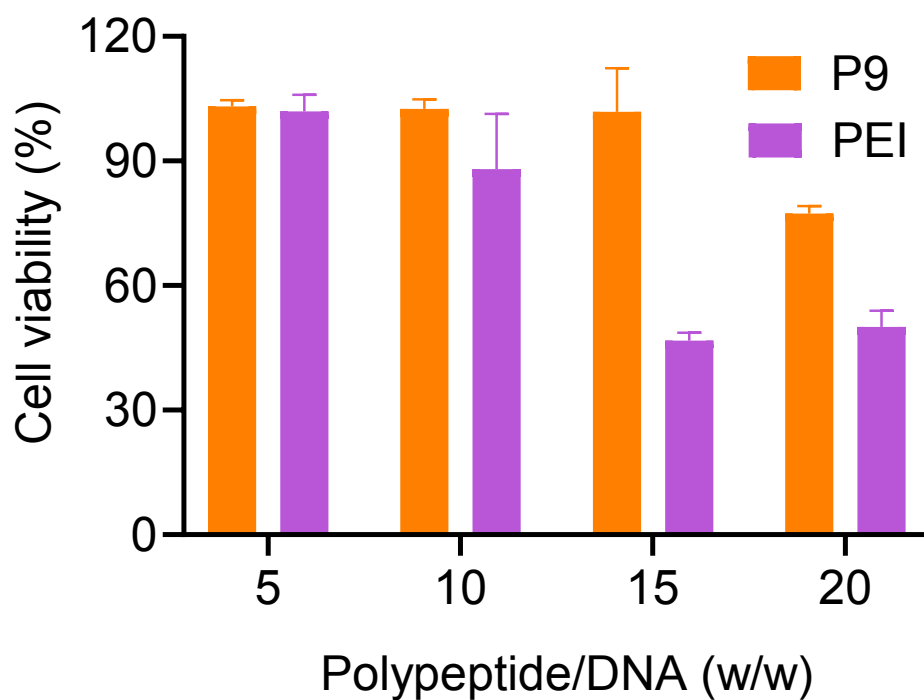

**Figure S13.** Cytotoxicity of P9/DNA or PEI/DNA complexes against RAW 264.7 cells ( $n = 3$ ).

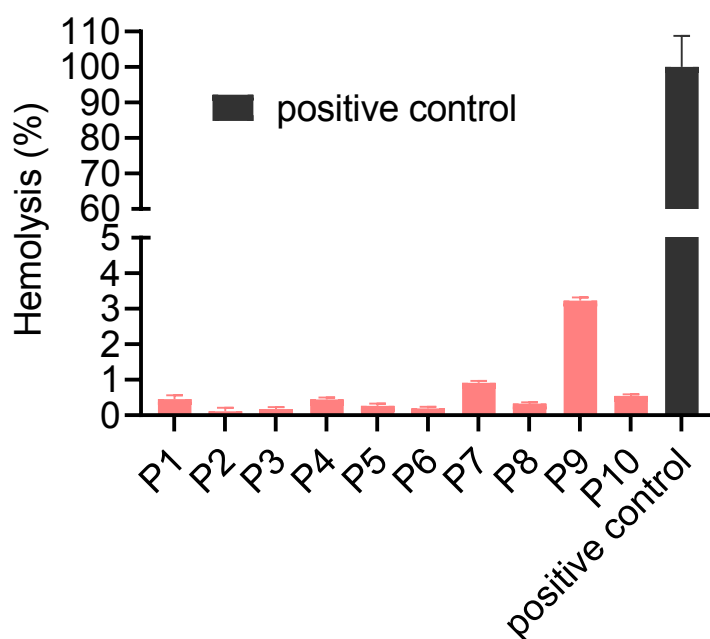

**Figure S14.** Hemolysis activity of polypeptides at best transfection concentration of 10  $\mu\text{g}/\text{mL}$  ( $n=3$ ).
